1  
2  
3  
4  
5  
6  
7  
8  
9  
10  
11  
12  
13  
14  
15  
16  
17  
18  
19  
20  
21  
22  
23  
24  
25  
26  
27

# **Myelin development in visual scene-network tracts beyond late childhood: A multimodal neuroimaging study**

Tobias W. Meissner<sup>a,b</sup>, Erhan Genç<sup>c</sup>, Burkhard Mädler<sup>d</sup>, Sarah Weigelt<sup>a</sup>

<sup>a</sup>TU Dortmund University, Faculty of Rehabilitation Sciences, Department of Vision, Visual Impairments & Blindness, Emil-Figge-Str. 50, 44227 Dortmund, Germany

<sup>b</sup>Ruhr University Bochum, Faculty of Psychology, Universitätsstr. 150, 44801 Bochum, Germany

<sup>c</sup>Ruhr University Bochum, Faculty of Psychology, Institute for Cognitive Neuroscience, Department of Biopsychology, Universitätsstr. 150, 44801 Bochum, Germany

<sup>d</sup>Philips GmbH, Health Systems Department, Hamburg, Germany

**Corresponding author:** Tobias W. Meissner, [tobias.meissner@rub.de](mailto:tobias.meissner@rub.de)

**Email of co-authors:** EG: [erhan.genc@rub.de](mailto:erhan.genc@rub.de), BM: [burkhard.maedler@philips.com](mailto:burkhard.maedler@philips.com), SW: [sarah.weigelt@tu-dortmund.de](mailto:sarah.weigelt@tu-dortmund.de)

28

## Highlights

- 29 • Myelin in intrahemispheric scene-network tracts increases beyond late childhood
- 30 • OPA-hippocampus tracts also show prolonged myelination
- 31 • Diffusion tensor imaging parameters do not mirror myelin water fraction results

32

## Abstract

33 The visual scene-network—comprising the parahippocampal place area (PPA), retrosplenial cortex  
34 (RSC), and occipital place area (OPA)—shows a prolonged functional development. Structural  
35 development of white matter that underlies the scene-network has not been investigated despite its  
36 potential influence on scene-network function. The key factor for white matter maturation is  
37 myelination. However, research on myelination using the gold standard method of post-mortem  
38 histology is scarce. *In vivo* alternatives diffusion-weighted imaging (DWI) and myelin water imaging  
39 (MWI) so far report broad-scale findings that prohibit inferences concerning the scene-network. Here,  
40 we combine MWI, DWI tractography, and fMRI to investigate myelination in scene-network tracts in  
41 middle childhood, late childhood, and adulthood. We report increasing myelin from middle childhood  
42 to adulthood in left RSC-OPA, and trends towards increases in the right RSC-OPA, left PPA-RSC and  
43 right PPA-OPA tracts. Moreover, tracts connecting the OPA to the key input region hippocampus  
44 showed myelin increases beyond late childhood. Our findings indicate that structural development  
45 coincides with functional development in the scene network, possibly enabling structure-function  
46 interactions.

47

## Keywords

48 white matter, maturation, connectivity, diffusion weighed imaging, scene recognition, high-level  
49 vision

50

## 51 **1 Introduction**

52           The human cortical visual system contains three high-level areas that preferentially respond to  
53 scenes compared to other stimuli, e.g. objects or faces: the parahippocampal place area (PPA, Epstein  
54 & Kanwisher, 1998), the retrosplenial cortex (RSC, O'Craven & Kanwisher, 2000), and the occipital  
55 place area (OPA, Grill-Spector, 2003; Hasson, Harel, Levy, & Malach, 2003). This functional network  
56 is strongly involved in scene processing (e.g. Bettencourt & Xu, 2013; Dilks, Julian, Kubilius, Spelke,  
57 & Kanwisher, 2011; Epstein, Higgins, Jablonski, & Feiler, 2007a), but also in orientation and  
58 navigation (e.g. Epstein, 2008; Julian, Ryan, Hamilton, & Epstein, 2016). The scene-network's  
59 components are already evident in middle childhood but at least for the PPA and the OPA there is  
60 evidence for a protracted development in terms of functional size and scene-selectivity beyond late  
61 childhood, possibly until adulthood (Chai, Ofen, Jacobs, & Gabrieli, 2010; Golarai et al., 2007;  
62 Meissner, Nordt, & Weigelt, 2019b).

63           Despite this commencing understanding of the developmental trajectory of scene-network  
64 function between middle childhood and adulthood, the development of the white matter structure  
65 underlying the scene-network has not received attention so far. However, white matter microstructure  
66 changes in corresponding brain areas were shown to be an underlying mechanism for specific  
67 cognitive development or differences, as has been evidenced for musical proficiency (Bengtsson et al.,  
68 2005), vocabulary development (Pujol et al., 2006), and many other cognitive abilities (for an  
69 overview see Fields, 2008). Thus, maturational status of scene-network white matter structure might  
70 influence scene-network gray matter functional development, or vice versa (Fields, 2015; Zatorre,  
71 Fields, & Johansen-Berg, 2012).

72           The PPA, RSC, and OPA contribute to the complex tasks of scene processing and navigation  
73 through (at least partially) distinct functional response properties (Baldassano, Esteva, Fei-Fei, &  
74 Beck, 2016a; Epstein & Higgins, 2007; Epstein, Parker, & Feiler, 2007b; Hutchison, Culham,  
75 Everling, Flanagan, & Gallivan, 2014; Vass & Epstein, 2013). Due to these distinct contributions, an  
76 efficient and mature transmission of signals between these areas is considered crucial for building an  
77 integrated perception of scenes. Further, the scene network does not work in an isolated fashion. On

Meissner et al. - Myelin development in visual scene-network tracts

78 the one hand, following the hierarchical organizational principle of the visual cortex, the early visual  
79 cortex (EVC) is a major input area to the PPA, RSC, and OPA (Grill-Spector & Malach, 2004).  
80 Unsurprisingly, studies in the past decades show that scene-selective areas are retinotopically  
81 organized and show strong functional connectivity to the EVC (Baldassano et al., 2016a; Baldassano,  
82 Fei-Fei, & Beck, 2016b; Epstein & Baker, 2019). On the other hand, recent evidence suggests that the  
83 hippocampus (HC) might be part of the scene-network or at least a major input-output region  
84 (Baldassano et al., 2016a; Baldassano, Beck, & Fei-Fei, 2013; Dalton, Zeidman, McCormick, &  
85 Maguire, 2018; Graham, Barense, & Lee, 2010; Hodgetts et al., 2017; Hodgetts, Shine, Lawrence,  
86 Downing, & Graham, 2016; Zeidman, Mullally, & Maguire, 2015). Consequently, an efficient signal  
87 transmission between the scene network areas and key areas working in concert with them to achieve  
88 scene perception should be an important developmental step.

89         Signal transmission can be optimized through increasing speed, synchrony, or reliability—all  
90 of which are mediated by increases in axon myelination (Miller, 1994; Zatorre et al., 2012). Axon  
91 myelination has traditionally been measured in post-mortem histological studies. However, post  
92 mortem-studies are rare in general and most studies focus on newborns' and young infants' gray  
93 matter myelin content. In the only histological study investigating white matter myelin development  
94 beyond middle childhood, the authors report tract-specific maturation patterns featuring peak myelin  
95 growth rates within the first two years after birth as well as continued maturation up middle childhood  
96 (Yakovlev & Lecours, 1967). Evidence for development beyond childhood was limited to intracortical  
97 neuropil and association areas but should be regarded as rather anecdotal due to the low number of  
98 investigated tracts and specimens in that age group.

99         Due to the very limited availability of specimens for post-mortem histological myelin  
100 assessment, the advance of diffusion-weighted imaging (DWI), a non-invasive magnetic resonance  
101 imaging (MRI) method that has the potential to inform about myelin *in vivo*, represented a milestone.  
102 DWI has since been applied to probe developmental changes in white matter myelination extensively.  
103 However, most studies focused on major long fiber tracts, such as the internal capsule or the  
104 corticospinal tract, that can be readily identified (semi-) automatically using brain atlases (e.g. Lebel &

Meissner et al. - Myelin development in visual scene-network tracts

105 Beaulieu, 2011; Mukherjee et al., 2001). As most long tracts are not directly involved in the visual  
106 scene-processing system and effects of age on white matter maturation were shown to be tract-specific  
107 (e.g. Rollins et al., 2010), the current literature is not informative on scene-network white matter  
108 development. Short-range tracts, which are crucial for relaying information in specialized functional  
109 networks over short distances, such as the scene-network, are understudied. The only relevant findings  
110 suggest ongoing myelination in temporal and parietal lobe short-range tracts (Oyefiade et al., 2018) or  
111 in white matter adjacent to dorsal and ventral visual stream cortical areas (Barnea-Goraly et al., 2005;  
112 Loenneker et al., 2011) and thus remain too unspecific for any inference on scene-network  
113 developmental trajectories.

114 DWI's sensitivity to myelin stems from its sensitivity to the diffusion of water because myelin  
115 reduces the inter-axonal space, increasing the anisotropy of water diffusion as a consequence  
116 (Feldman, Yeatman, Lee, Barde, & Gaman-Bean, 2010). However, several microstructural properties,  
117 such as axon diameter, axon packing density (Takahashi et al., 2002), axon membrane permeability  
118 (Ford, Hackney, Lavi, Phillips, & Patel, 1998), and fiber geometry (van Wedeen, Hagmann, Tseng,  
119 Reese, & Weisskoff, 2005) affect diffusion tensor imaging (DTI) parameters, too. Therefore, deducing  
120 myelination or maturational status from DTI parameters alone is challenging in most and even, in  
121 some cases, speculative (Jones, Knösche, & Turner, 2013).

122 Myelin water imaging (MWI, MacKay et al., 1994), another MRI technique, is sensitive to  
123 myelin, highly reproducible (Meyers et al., 2009), and not affected by other microstructural changes,  
124 (Laule et al., 2006; Laule et al., 2008; Moore et al., 2000). Thus, it gives a more direct estimation of  
125 the status of myelination than interpretation of DTI parameters alone. Yet, MWI has only recently  
126 become available in pediatric research settings, thanks to the implementation of parallel imaging  
127 (SENSE, Pruessmann, Weiger, Scheidegger, & Boesiger, 1999) and advances in sequence design  
128 (Deoni, Rutt, Arun, Pierpaoli, & Jones, 2008; Prasloski et al., 2012) which both drastically sped up  
129 acquisition time.

130 A series of MWI studies investigated infants and young children and found steep increases of  
131 myelin from birth to age two and a moderate increase thereafter (e.g. Dean et al., 2014; Dean et al.,

Meissner et al. - Myelin development in visual scene-network tracts

132 2015; Deoni et al., 2011; Deoni, Dean, O'Muircheartaigh, Dirks, & Jerskey, 2012; Deoni, Dean,  
133 Remer, Dirks, & O'Muircheartaigh, 2015). Recent findings indicate that while myelin does not seem to  
134 increase between middle and late childhood, a pronounced increase of myelin occurs in adolescence in  
135 major white matter tracts (Geeraert et al., 2018; Meissner, Genç, Mädler, & Weigelt, 2019a).  
136 However, scene-network specific data has not been analyzed until now.

137 To complement recent findings regarding the functional development of scene-network  
138 regions PPA, RSC, and OPA (Meissner et al., 2019b), we combined MWI and DWI-based  
139 probabilistic tractography to probe the structural maturation, i.e. myelin water fraction (MWF), of  
140 white matter that underlies scene-network function in middle childhood (7-8 years), late childhood  
141 (11-12 years), and adulthood (19-24 years). As previous behavioral studies identified a marked  
142 improvement in the performance in scene processing around the age of 10 (Day, 1975; Mackworth &  
143 Bruner, 1970; Munsinger & Gummerman, 1967; Vurpillot, 1968), these age groups were specifically  
144 chosen to capture the neural status—possibly underlying the behavior—before and after the change, as  
145 well as in a mature reference group. Further, we tested whether tracts that connect the scene-network  
146 with their key input/output areas such as the EVC or the HC, show increased myelination over time. In  
147 an extended analysis, we tested whether DWI parameters mirror our MWI results.

148

## 149 **2 Methods**

### 150 **2.1 Participants**

151 We analyzed data of 18 children aged 7-8 (*Mean (M)* = 7.56, *standard deviation (SD)* = 0.51;  
152 7 female; henceforth: 7-8yo), 13 children aged 11-12 (*M* = 11.23, *SD* = 0.44; 8 female; henceforth: 11-  
153 12yo) and 16 adults aged 19-24 (*M* = 20.69, *SD* = 1.14; 7 female) for this study. The original sample  
154 included one additional 7-8yo that was excluded due to severely impaired data quality in the DWI  
155 scan, one 7-8yo that did not complete the myelin water imaging scan, and one 11-12yo, in which our  
156 localizer failed to reveal any scene-selective ROIs. Our study worked towards answering several  
157 associated research questions and included multiple MRI sequences. Thus, most participants' localizer  
158 data (see 2.2.2, Region of interest definition) was analyzed in a previous publication, which also holds  
159 detailed information on recruitment and compensation (Meissner et al., 2019b). All participants were  
160 healthy, had normal or corrected-to-normal vision, and had been born at term. No participant had past  
161 or current neurological or psychiatric conditions, or structural brain abnormalities.

### 162 **2.2 Neuroimaging**

163 All magnetic resonance images were acquired at the Neuroimaging Centre of the Research  
164 Department of Neuroscience at Ruhr University Bochum's teaching hospital Bergmannsheil on a 3.0T  
165 Achieva scanner (Philips, Amsterdam, The Netherlands) using a 32-channel head coil. Acquisition of  
166 data reported in this manuscript was part of a longer protocol that included further functional scans. To  
167 reassure children and parents as well as to provide the possibility for low-threshold contact, children  
168 were accompanied by one of the experimenters in the scanner room throughout the entire procedure.  
169 Children who had not participated in an MRI study before were accustomed to the scanning  
170 environment, experimental procedure, and localizer task in a custom-built mock scanner at least one  
171 day prior to scanning. Participants were presented with short movie clips of a children's TV program  
172 during the acquisition of structural MRI.

173 **2.2.1 High-resolution anatomical imaging and cortical parcellation**

174 To co-register magnetic resonance images from different sequence types (EPI, DWI, GRASE)  
175 as well as for gray-white matter segmentation and cortical parcellation, we acquired a T1-weighted  
176 high-resolution anatomical scan of the whole head (MP-RAGE, TR = 8.10 ms, TE = 3.72 ms, flip  
177 angle = 8°, 220 slices, matrix size = 240 × 240, voxel size = 1 mm × 1 mm × 1 mm). We excluded  
178 non-brain parts of the head using FSL BET (Smith, 2002).

179 We used FreeSurfer (RRID: SCR\_001847, version 6.0.0) for automated cortical parcellation  
180 and segmentation of the T1-weighted images. The details of the applied recon-all analysis pipeline  
181 have been described elsewhere (Dale, Fischl, & Sereno, 1999; Fischl et al., 2002; Fischl et al., 2004;  
182 Fischl, Sereno, & Dale, 1999; Ségonne et al., 2004) and the procedure has been shown to be valid for  
183 all age groups in our study to the same extent (Ghosh et al., 2010).

184 To localize the EVC and the HC, we used FreeSurfer's implemented probabilistic atlases  
185 (Fischl et al., 2008). For the EVC, atlases for the primary and secondary visual area (V1 and V2) were  
186 used. We converted V1, V2, and HC FreeSurfer surface labels to ROI masks in FSL anatomical T1  
187 space using FreeSurfer's `bbregister` and `mri_label2vol` commands. Next, we registered V1, V2, and  
188 HC masks to DWI space using FSL FLIRT (FMRIB's Linear Image Registration Tool, Greve &  
189 Fischl, 2009; Jenkinson, Bannister, Brady, & Smith, 2002; Jenkinson & Smith, 2001) for probabilistic  
190 tractography (Figure 1, top, middle). V1 and V2 were merged into a single EVC ROI, as later fiber  
191 tracking from V1 and V2 were barely distinguishable (see 2.2.3 Diffusion weighed imaging).

192 **2.2.2 Region of interest definition**

193 To define scene-selective regions of interest (ROIs), we obtained functional MRI during a  
194 four-run scene localizer block design experiment that included scenes, objects, and a rest condition  
195 using a blood oxygen level dependent (BOLD) sensitive T2\*-weighted sequence across 33 slices (TR  
196 = 2000 ms, TE = 30 ms, flip angle = 90°, FOV = 240 mm × 240 mm, voxel size = 3 mm × 3 mm × 3  
197 mm, slice gap = 0.4 mm). Details of the scene localizer experimental design are reported elsewhere  
198 (Meissner et al., 2019b).

199 We used FSL FEAT (FMRIB's Software Library, version 5.0.11, RRID: SCR\_002823,



Meissner et al. - Myelin development in visual scene-network tracts

200 Jenkinson, Beckmann, Behrens, Woolrich, & Smith, 2012; FMRI Expert Analysis Tool, version 6.0.0,  
 201 Woolrich, Ripley, Brady, & Smith, 2001) for preprocessing and statistical analysis of functional MRI  
 202 localizer data. Preprocessing of functional data included brain extraction, slice time correction, motion  
 203 correction, high-pass temporal filtering (cutoff: 91 s) and registration to the T1 anatomical image for  
 204 each run in a first-level analysis. First-level statistical results were then entered into a mixed-effects  
 205 second-level analysis (FLAME 1 option; Woolrich, Behrens, Beckmann, Jenkinson, & Smith, 2004),  
 206 yielding statistical  $t$ -value maps for the scene > object contrast for each participant.

207 To define ROIs, we registered each participant's  $t$ -value maps to her/his anatomical T1 image  
 208 using sinc interpolation with FSL FLIRT (Figure 1, top, left). Using FSLEyes (version 0.22.6,  
 209 McCarthy, 2018), we defined subject-specific PPA, RSC, and OPA in each hemisphere at plausible  
 210 locations based on thresholded  $t$ -value maps (Figure 1, top, middle; for exemplary ROIs, see Figure  
 211 2a). For the PPA and RSC, we included contiguous voxels whose scenes > objects contrast exceeded  
 212 the  $t$ -value of 5.75. For the OPA, we chose a more liberal threshold of  $t > 4$ , because the OPA can  
 213 rarely be detected at the same threshold as the PPA and RSC (without overlapping and hardly

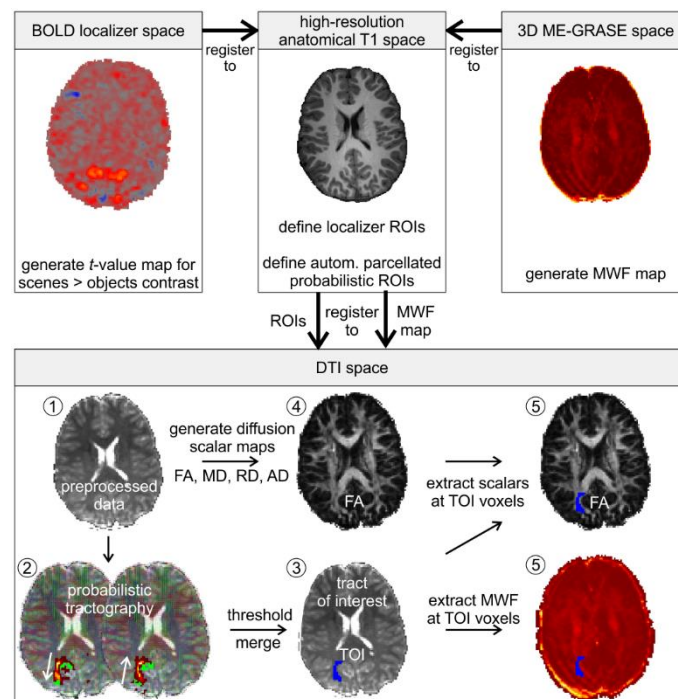

Figure 1: Analysis pipeline overview. The anatomical image in T1 space was used as a common intermediate registration template and connecting link between DTI space and non-diffusion spaces, i.e. BOLD and GRASE space. Numbers in circles indicate the order of analysis steps in DTI space. green = seed and target ROI (here: right RSC and OPA) for probabilistic tractography, heatmap arch = result for probabilistic tractography in which brighter colors indicate more samples crossing that voxel, blue = merged and thresholded TOI mask.

214 definably clusters of PPA and RSC at liberal thresholds or not detecting the OPA a conservative  
215 thresholds; cf. Meissner et al., 2019b).

216 For all ROIs, this approach yielded high detection rates that did not differ between age groups  
217 as determined using Fisher's exact test (S1 Table). One 11-12yo was excluded from subsequent  
218 analyses, because activations for the scenes > objects contrast did not exceed the set thresholds. For  
219 each participant, we registered the T1 anatomy to the b=0 DWI image using trilinear transformation  
220 with FSL FLIRT. The resulting transformation matrix was then used to register each ROI from  
221 anatomical T1 space to DWI space using nearest neighbor interpolation. For six ROIs in six  
222 participants, interpolation to the target space using the nearest neighbor algorithm failed. This was  
223 presumably due to their small size of 1 mm<sup>3</sup> to 5 mm<sup>3</sup> and the consequently difficult mapping to the  
224 quadrupled voxel size of 4 mm<sup>3</sup> of the DWI target space. To still include these ROIs in the analysis,  
225 we applied a trilinear interpolation approach in FSL FLIRT, which does not produce a binary mask,  
226 but a continuous probability map for that ROI in target space. To obtain a binary ROI mask again, we  
227 included all voxels at and above the probability map's median value. This procedure was successful  
228 for all six ROIs in which the original nearest neighbor algorithm failed.

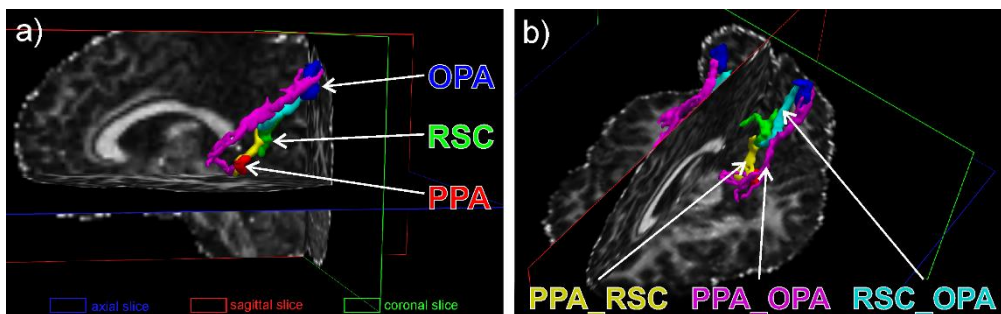

Figure 2: Scene-selective areas (a) and fiber tracts (b) for an exemplary 7-8yo participant. Areas and tracts are reconstructed in native 3D DTI space on top of a FA map. Areas, tracts, and FA map are smoothed for better visualization. Tracts are displayed in uniform color for easier identification; for an example of a tract probability (heat-)map, see Figure 1, bottom, left.

### 229 2.2.3 Diffusion weighted imaging

230 For fiber tracking and diffusion parameter analysis, a diffusion-weighted single-shot spin-echo  
231 EPI sequence along 33 isotropically distributed directions using a b-value of 1000 s/mm<sup>2</sup> (TR = 7234  
232 ms, TE = 89 ms, flip angle = 90°, 60 slices, matrix size = 128 × 128, voxel size = 2 × 2 × 2 mm) was  
233 obtained. At the beginning of this sequence, one reference image was acquired without diffusion  
234 weighting (b = 0 s/mm<sup>2</sup>). For analysis of diffusion weighted data, we used FSL's FDT (FMRIB's  
235 Diffusion Toolbox). Preprocessing of DWI data included eddy current and motion artefact correction

Meissner et al. - Myelin development in visual scene-network tracts

236 using FSL eddy\_correct, diffusion gradient vectors reorientation to match the correction-induced  
237 rotations, as well as brain extraction (Figure 1, bottom, #1).

238 We performed probabilistic tractography on our data in native diffusion space using FSL  
239 BEDPOSTX and PROBTRACKX (Behrens et al., 2003; Behrens, Berg, Jbabdi, Rushworth, &  
240 Woolrich, 2007) with default settings, but 25,000 tract-following streamlines originating from each  
241 seed mask voxel (Figure 1, bottom, #2). For each participant, fiber tracking was done for 24  
242 intrahemispheric tracts. In turn, each of the six scene-selective ROIs—as defined by our localizer (see  
243 2.2.2, Region of interest definition)—was set as the seed mask. For each seed mask, i.e. for each  
244 scene-selective ROI, four ipsilateral target masks were set: 1-2) the two other scene ROIs, 3) the HC,  
245 4) the EVC (Figure 3). For these 18 seed-target pairs, probabilistic tractography was done in both  
246 directions. That is, after the initial seed-to-target tracking was done, a target-to-seed tracking estimated  
247 the same tract in reverse direction (cf. Genç, Bergmann, Singer, & Kohler, 2011). For both directions,  
248 target masks were also set as waypoint and termination masks to ensure that only tracts would be  
249 retained that entered the target mask and that did not project onto other areas. Our rationale for  
250 employing this dual-direction approach was to control for any direction specific biases in probabilistic  
251 tractography, avoiding under- as well as overrepresentation of tract size or detectability. We refrained

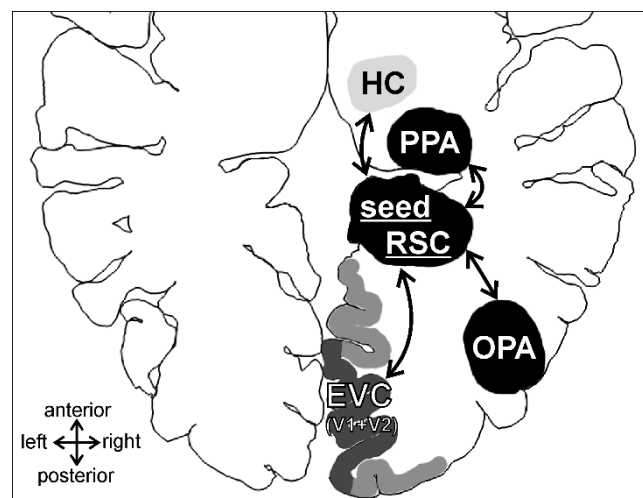

Figure 3: Schematic exemplary seed region (rRSC) with target regions and tract connections. For each scene-selective ROI, fiber tracking was done with the ipsilateral early visual cortex (EVC, i.e. a merged ROI of V1 and V2), hippocampus (HC), and the other two ipsilateral scene-selective ROIs (here: PPA and OPA). Note that in order to show all seed and target regions in one comprehensive display, this is a schematic drawing that does not reflect the appropriate absolute or relational position and size of target and seed regions.

Meissner et al. - Myelin development in visual scene-network tracts

252 from interhemispheric tracking, as DWI and MWI parameters from these tracts would be masked by a  
253 major share of general corpus callosum development adding little—if any—insight into scene-network  
254 specific development (for corpus callosum development, see Meissner et al., 2019a).

255 For each voxel, the resulting probability maps indicate how many of the streamlines that  
256 successfully connected seed-to-target crossed this voxel. However, these probability maps include  
257 low-probability voxels that are likely to be spurious connections. To remove these spurious  
258 connections, we threshold individual tract maps at 20% of their robust maximum (99th percentile)  
259 value (cf. Koldewyn et al., 2014) and then merged seed-to-target and target-to-seed tracts using a  
260 logical *and*-condition (Figure 1, bottom, #3; for exemplary tracts, see Figure 2b). Like other  
261 thresholding approaches, this accounts for systematically different ROI sizes. Moreover, in contrast to  
262 thresholding based on the number of initiated or successful streamlines, our approach provides a better  
263 interpretability, as the number of initiated or successful streamlines offers little insight into the actual  
264 probability map value distribution.

265 Originally, tracking from scene ROIs to the EVC was split into tracking to V1 and V2 based  
266 on their respective probabilistic FreeSurfer labels (see 2.2.1 High-resolution anatomical imaging and  
267 cortical parcellation). However, visual inspection of final thresholded tracts revealed that tracts from  
268 scene ROIs to V1 and V2 were overlapping for the most part. Thus, we merged V1 and V2 ROIs to an  
269 EVC ROI and repeated the tracking procedure for the EVC ROI.

270 To evaluate white matter microstructural integrity in fiber tracts of interest, we fit diffusion  
271 tensors, modelled by three pairs of eigenvectors ( $\varepsilon_1, \varepsilon_2, \varepsilon_3$ ) and eigenvalues ( $\lambda_1, \lambda_2, \lambda_3$ ) that describe the  
272 direction and magnitude of water diffusion along three orthogonal axes, to each voxel of our  
273 preprocessed DWI data using FSL DTIFIT. We then calculated axial, radial and mean diffusivity ( $AD$   
274  $= \lambda_1$ ,  $RD = (\lambda_1 + \lambda_2)/2$ ,  $MD = (\lambda_1 + \lambda_2 + \lambda_3)/3$ ), as well as fractional anisotropy ( $FA =$   
275  $\sqrt{3/2} \times \sqrt{(\lambda_1 - MD)^2 + (\lambda_2 - MD)^2 + (\lambda_3 - MD)^2} / \sqrt{\lambda_1^2 + \lambda_2^2 + \lambda_3^2}$ ) as diffusion parameters of  
276 interest (Figure 1, bottom, #4). Weighted mean diffusion tensor imaging (DTI) metric values for each  
277 tract were obtained that that considered each voxel's DTI metric values and tract probability (Yendiki  
278 et al., 2011, Figure 1, bottom, #5). In detail, the weighed mean is the sum of all tract voxels' DTI

279 metric values multiplied with their tract probabilities. Each voxel's tract probability is the crossing  
280 streamline count of the voxel divided by the sum of the crossing streamline count across all voxels.

#### 281 **2.2.4 Myelin water imaging**

282 To examine the myelination state of white matter tracts, a 3D multi-echo (ME) gradient spin  
283 echo (GRASE) sequence with refocusing sweep angle was acquired (TR = 800 ms; TE = 10 - 320 ms,  
284 32 echoes in steps of 10 ms, partial Fourier acquisition (z-direction: 50% overcontiguous slices, i.e.  
285 acquired slice thickness = 4 mm, reconstructed slice thickness = 2 mm; y-direction: none), parallel  
286 imaging SENSE = 2.0, flip angle = 90°, 60 slices, matrix size = 112 × 112, voxel size = 2 × 2 × 2 mm,  
287 acquisition duration = 7.25 min). Parameter maps estimating the fraction of water molecules located  
288 between myelin layers—the myelin water fraction (MWF, MacKay et al., 1994 )—for each voxel were  
289 created as described elsewhere (Prasloski et al., 2012). MWF maps were then registered to native DWI  
290 space using FSL FLIRT (Figure 1, top, right and middle). Here, for high-accuracy transformations, we  
291 employed a two-step procedure. First, we registered the TE = 10 ms image of the GRASE sequence to  
292 anatomical T1 space using trilinear transformation. The resulting transformation matrix was then used  
293 to register the MWF map to anatomical T1 space using sinc interpolation. Second, we registered the  
294 T1 anatomy to the b=0 DWI image using trilinear transformation. The resulting transformation matrix  
295 was then used to register the MWF map from anatomical T1 space to DWI space using sinc  
296 interpolation. Weighted mean MWF values for each tract were obtained that considered each voxel's  
297 MWF value and tract probability (in the same way as it was done for DWI, Figure 1, bottom, #5).

#### 298 **2.3 Neuroimaging data quality control**

299 We screened preprocessed 4D DWI data and FA maps for visible artefacts that were not  
300 corrected by the preprocessing steps and excluded one 7-8yo participant from subsequent analyses.  
301 Further, to control for possible age group differences in DWI data quality, we quantified two  
302 registration-based and two intensity-based data quality measures implemented in the FreeSurfer  
303 TRACULA toolbox (Yendiki et al., 2011). For the registration-based measures, mean volume-to-  
304 volume translation and rotation parameters were obtained from affine registration matrices of each  
305 volume to the first (b=0) volume. This was to capture global, slow between-volume motion. Our  
306 analysis of variance (ANOVA) on both translation and rotation parameters did not reveal any

Meissner et al. - Myelin development in visual scene-network tracts

307 significant between-group differences (Figure 4; rotation:  $F(2,44) = 1.52, p = .230, \eta^2 = .065$

308 translation:  $F(2,44) = 2.27, p = .115, \eta^2 = .094$ )

309 For the intensity-based measures, we calculated a signal intensity drop-out score for each slice  
310 in each volume in reference to the corresponding slice in the b=0 volume as proposed by Benner et al.  
311 (2011). This was to capture the effect of rapid within-volume motion (note: TR = 7234 ms). We then

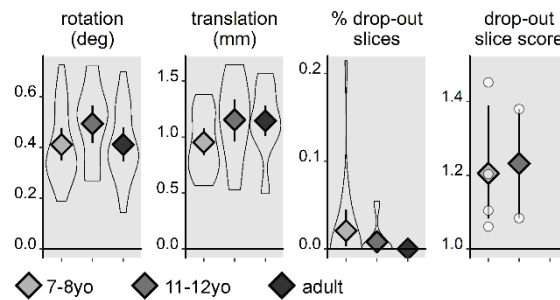

Figure 4: Between-group data quality comparison after matching for the percentage of drop-out slices. Gray diamonds = group mean. Light gray = 7-8-year-old children, medium gray = 11-12-year-old children, dark gray = adults. Violin plots show the full distribution of the data. White circles = individual data points. Error bars show 95% confidence intervals for the mean.

312 quantified the percentage of slices with suspect signal drop-out across the scan—indicated by a score  
313 greater than 1—as well as the average signal drop-out severity for those “bad” slices. Four 7-8yo, two  
314 11-12yo, but no adults displayed any slices with strong signal dropout (Figure 4). In participants with  
315 signal dropout, we observed a maximum portion for “bad” slices of 0.21 %. Due to the low number of  
316 participants with signal dropout, and no signal dropout in the adult group (i.e. no variance) any  
317 ANOVA-based group comparison for the drop-out slice score or percentage of drop-out slices would  
318 lack validity. Thus, we employed Fisher’s exact test and found that the number of participants with  
319 any signal-dropout did not differ between age groups ( $\chi^2(2) = 3.87, p = .152$ ).

320 As the 3D signal acquisition method of the GRASE sequence is not volume-based, affine  
321 registration matrices and corresponding motion estimates, like for functional MRI or DWI cannot be  
322 computed for 3D ME-GRASE data. However, we visually screened all raw GRASE images as well as  
323 MWF maps for motion artefacts but found none.

## 324 2.4 Experimental design, statistical analysis

325 Our study investigated the effect of the between-subject factor age group (with three levels) on  
326 the outcome variables MWF, FA, MD, RD, and AD for six scene-selective fiber tracts. In an

Meissner et al. - Myelin development in visual scene-network tracts

327 exploratory analysis, further tracts were tested between all six scene-selective ROIs and the EVC and  
328 HC, respectively. To test for differences between age groups, we employed analysis of variances  
329 (ANOVAs) for each fiber tract independently. To correct for multiple comparison, the default  
330 significance threshold of  $\alpha = .05$  was Bonferroni-corrected for 6 tracts to  $\alpha = .0083$ . To improve the  
331 usability of our results for colleagues whose research interest focuses on one or a particular region or  
332 tract of interest only, we also report age group effects that reached the uncorrected significance  
333 threshold of  $\alpha = .05$  in a second step. Statistical data analysis was performed using R (version 3.6.0,  
334 RRID: SCR\_001905, R Core Team, 2019) in RStudio (version 1.2.1335; RRID: SCR\_000432).

335

### 336 3 Results

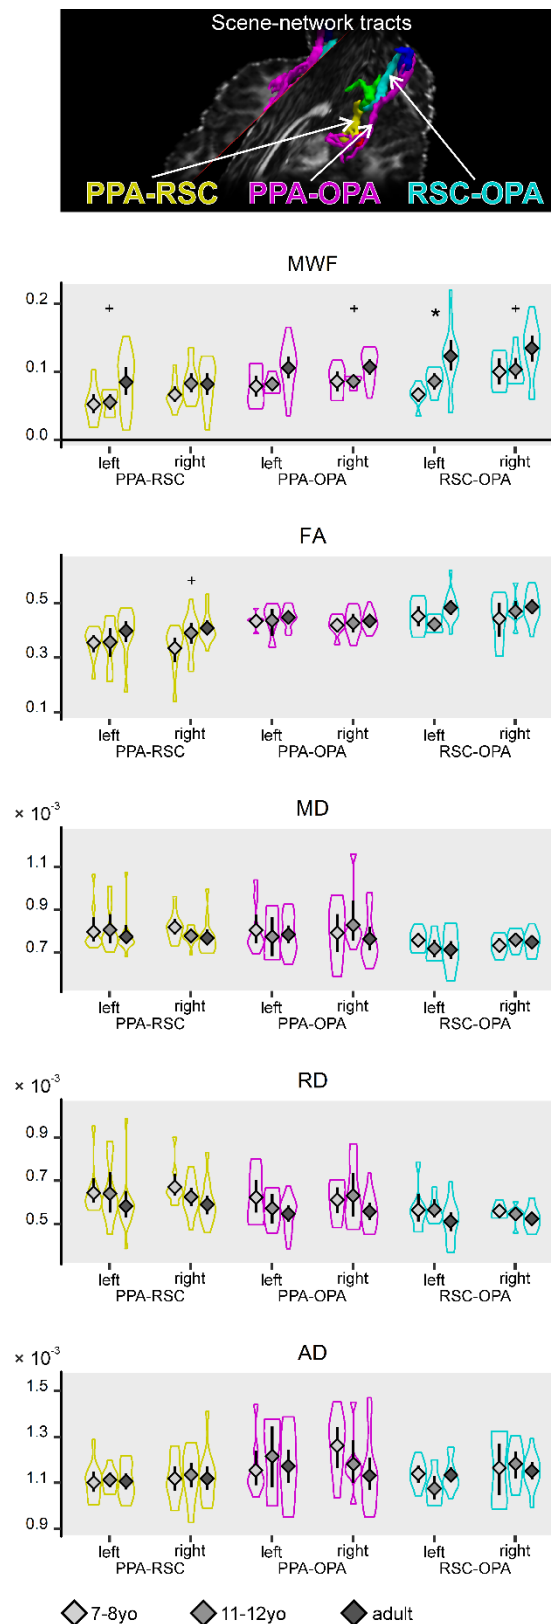

Figure 5: Myelin water fraction (MWF) and DTI parameters for intrahemispheric connections between scene-network areas. Gray diamonds = group mean. Light gray = 7-8-year-old children, medium gray = 11-12-year-old children, dark gray = adults. Error bars show 95% confidence intervals for the mean. Violin plots show the full distribution of the data. Asterisks and plus signs indicate significance with Bonferroni correction ( $\alpha = .0083$ ) and without correction for multiple comparisons ( $\alpha = .05$ ), respectively.



337 This study combined myelin water imaging with a functional MRI scene localizer and DWI-  
338 based tractography to determine the degree of myelination in white matter tracts underlying the  
339 cortical scene-network in three age groups. We examined possible differences in myelin water fraction  
340 between eighteen 7-8yo, thirteen 11-12yo, and sixteen adults to examine if the scene-network's white  
341 matter structural connectivity follows a similar or divergent pattern in reference to scene-network's  
342 functional development. Further, we investigated connections between the scene-network and key  
343 input areas, such as EVC and the HC. In an extended analysis, we tested whether DTI parameters  
344 showed the same pattern as MWF.

### 345 **3.1 Myelin water imaging**

346 Regarding within-scene-network tracts, the MWF in fibers connecting the left RSC and OPA  
347 increased with age ( $F(2,25) = 7.40, p = .0030, \eta^2 = .372$ , Figure 5). We observed further increases,  
348 albeit not surviving Bonferroni correction, for the right RSC-OPA tract ( $F(2,25) = 3.47, p = .0470, \eta^2$   
349  $= .217$ ), the left PPA-RSC tract ( $F(2,31) = 3.99, p = .0288, \eta^2 = .205$ ), and the right PPA-OPA tract  
350 ( $F(2,26) = 3.82, p = .0352, \eta^2 = .227$ ).

351 For connections between the HC and scene-network areas, we found increasing MWF with  
352 age in tracts connecting to the OPA in both hemispheres (left:  $F(2,36) = 8.20, p = .0012, \eta^2 = .313$ ;  
353 right:  $F(2,37) = 5.97, p = .0056, \eta^2 = .244$ , Figure 6, first row left).

354 EVC-scene-network connections showed no significant increasing MWF with age. Non-  
355 significant increases, i.e. not surviving Bonferroni-correction, were observed for the left RSC-EVC  
356 tract ( $F(2,39) = 3.76, p = .0320, \eta^2 = .162$ ) and for OPA-EVC tracts in both hemispheres (left:  $F(2,36)$   
357  $= 5.18, p = .0105, \eta^2 = .224$ ; right:  $F(2,37) = 5.18, p = .0104, \eta^2 = .219$ , Figure 6, first row right).

### 358 **3.2 Extended analysis of DTI parameters**

359 Regarding within-scene-network tracts, the age group differences observed for MWF was not  
360 mirrored in DTI parameters. For FA, we found increasing MWF with age in the right PPARSC tract,  
361 but statistical significance did not meet our Bonferroni-correction criterion ( $F(2,36) = 3.80, p = .0318,$   
362  $\eta^2 = .174$ , Figure 5, second row). No other tract showed age effects for FA. Concerning the other DTI

Meissner et al. - Myelin development in visual scene-network tracts

363 parameters—MD, RD, and AD—we did not find any tracts with age group differences (Figure 5,  
364 third, fourth, and fifth row).

365 HC-scene-network connections showed the same pattern for FA as for MWF. Tracts from the  
366 HC to the left and right OPA showed increasing FA with age (left:  $F(2,36) = 6.73, p = .0033, \eta^2 =$   
367  $.272$ ; right:  $F(2,37) = 11.86, p = .0001, \eta^2 = .391$ , Figure 6, left, second row). However, other DTI  
368 parameters did not mirror MWF findings: MD showed an increase in left IPPA-HC connections with  
369 age ( $F(2,41) = 6.24, p = .0043, \eta^2 = .233$ , Figure 6, third row left), but not in other tracts. RD did not  
370 reveal differences between age groups in HC-connecting tracts. Concerning AD, tracts connecting the  
371 PPA and the HC showed age group differences, albeit increasing values for the left and decreasing  
372 values for the right hemisphere and not surviving Bonferroni-correction in either hemisphere (left:  
373  $F(2,41) = 4.14, p = .0230, \eta^2 = .168$ ; right:  $F(2,41) = 3.40, p = .0431, \eta^2 = .142$ , Figure 6, last row  
374 left).

375 In EVC-scene-network connections, DTI parameters did not exhibit age group differences that  
376 survived Bonferroni correction (Figure 6, second to fifth row, right). Only uncorrected, i.e. non-  
377 significant effects were found for decreasing RD in the left PPA-EVC tract ( $F(2,41) = 4.25, p = .0210,$   
378  $\eta^2 = .172$ ) and the right OPA-EVC tract ( $F(2,37) = 3.33, p = .0467, \eta^2 = .153$ , Figure 6, fourth row  
379 right).

### 380 **3.3 Control analyses**

381 To control for the possibility that any of the observed age effects were confounded by age-  
382 related tract volume differences, we compared tract volume between age groups using ANOVAs and  
383 found differences in tracts from the left PPA to the HC and EVC, from the right PPA to the HC and  
384 from the right OPA to the HC, but not in any other tracts (lPPA-HC:  $F(2,41) = 7.01, p = .0024, \eta^2 = .$   
385  $.254$ ; lPPA-EVC:  $F(2,41) = 6.18, p = .0045, \eta^2 = .232$ ; rPPA-HC:  $F(2,41) = 7.89, p = .0013, \eta^2 = .278$ ;  
386 rOPA-HC:  $F(2,37) = 6.85, p = .0029, \eta^2 = .270$ ). Thus, while MD effects in lPPA-HC tracts, RD

Meissner et al. - Myelin development in visual scene-network tracts

387 effects in IPPA-EVC tracts, as well as FA and MWF effects in rOPA-HC tracts might stem from tract  
 388 size differences between age groups, for all other tracts, volume seems an unlikely bias.

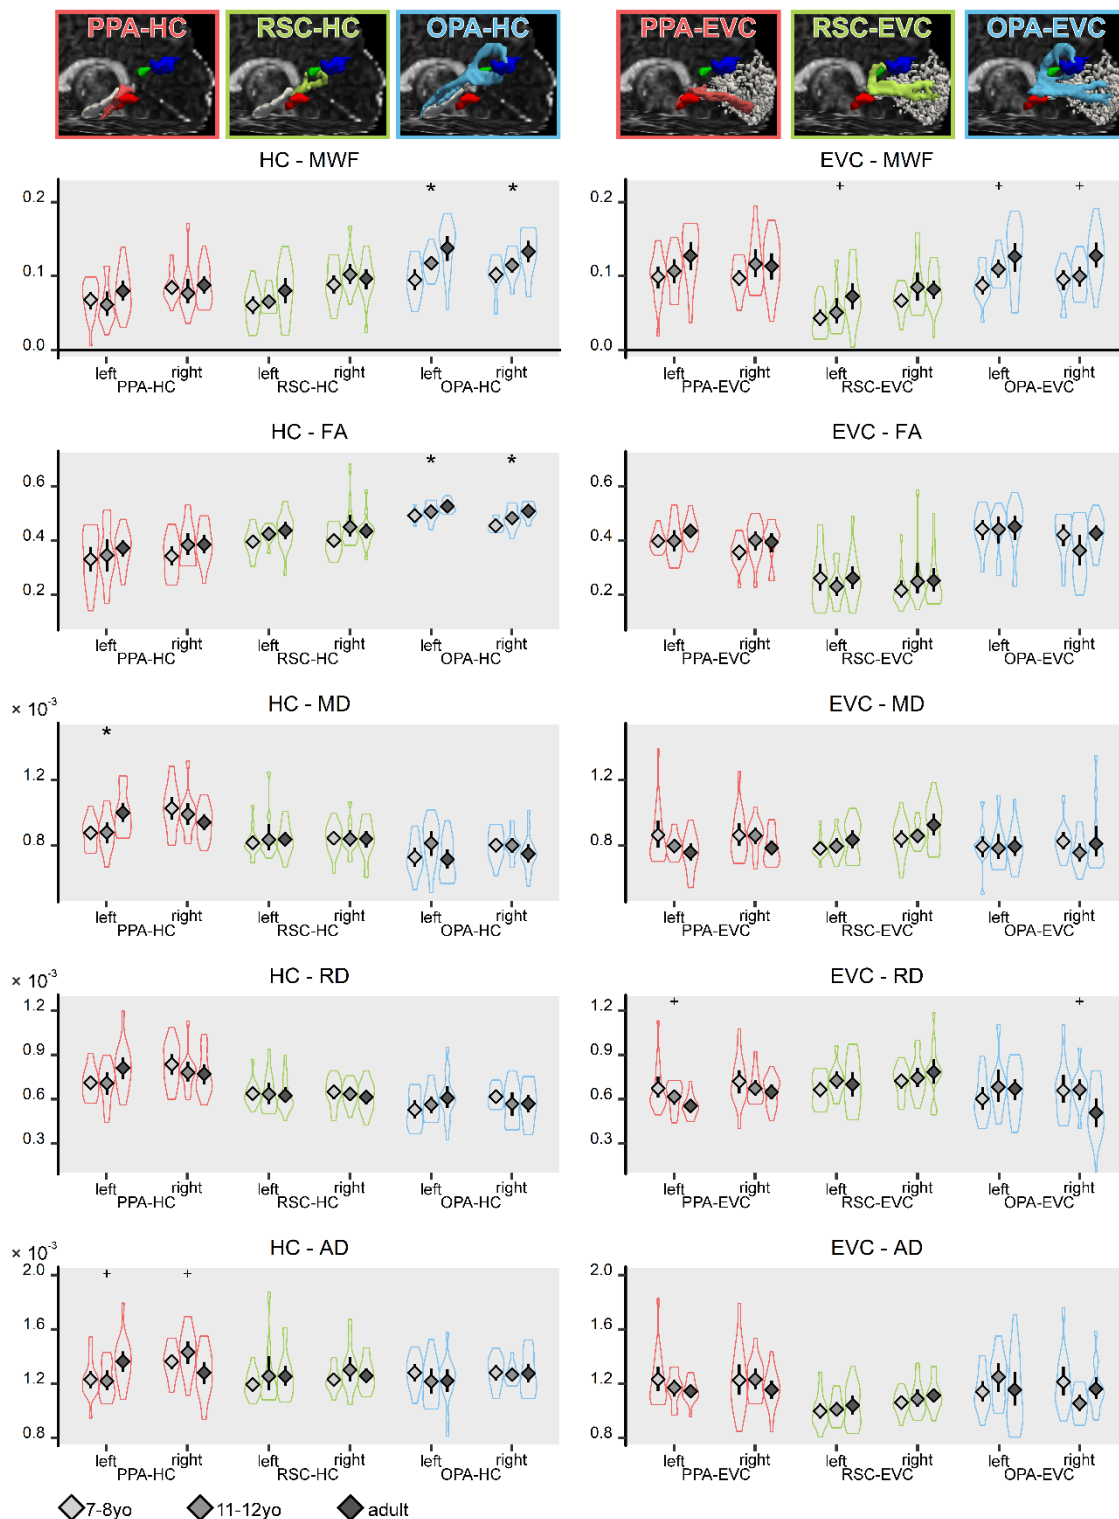

Figure 6: Myelin water fraction (MWF) and DTI parameters for connections between scene-network areas and the hippocampus (HC, left), early visual cortex (EVC, right). Gray diamonds = group mean. Light gray = 7-8-year-old children, medium gray = 11-12-year-old children, dark gray = adults. Error bars show 95% confidence intervals for the mean. Violin plots show the full distribution of the data. Asterisks and plus signs indicate significance with Bonferroni correction ( $\alpha = .0083$ ) and without correction for multiple comparisons ( $\alpha = .05$ ), respectively

## 390 **4 Discussion**

391 Myelin emergence and further maturation is a crucial step in brain development (Flechsig,  
392 1920). While myelin development trajectories for white matter beyond late childhood are still unclear,  
393 it is established that the rate of change and the point at which an adult level is reached is region  
394 specific (Yakovlev & Lecours, 1967). Further, myelin maturation was shown to interact with  
395 functional organization and behavior (e.g. Bengtsson et al., 2005; Yeatman, Dougherty, Ben-Shachar,  
396 & Wandell, 2012). Here, we compared MWF in white matter tracts underlying the visual scene-  
397 network between 7-8yo, 11-12yo and adults. We found increasing MWF in the left RSC-OPA tract  
398 and non-significant trends for increasing MWF in the right RSC-OPA, left PPA-RSC, and right PPA-  
399 OPA tracts. Moreover, myelin increased in connections from the left and right OPA to the HC, which  
400 is strongly involved in scene-processing. Moreover, myelin showed non-significant trends to increase  
401 in connections of the left and right OPA and the left RSC with the EVC, which is a major input area  
402 for scene-selective cortex.

### 403 **4.1 Connections between scene network areas**

404 Our findings provide evidence for a protracted development of white matter tracts that connect  
405 the scene-network regions PPA, RSC, and OPA. While age effects were only significant after  
406 Bonferroni correction in the left RSC-OPA tract, effect sizes for the non-significant trends right RSC-  
407 OPA, left PPA-RSC, and right PPA-OPA tracts were medium-to-large. Thus, we hope that future  
408 higher-powered work with larger sample sizes will confirm these trends. The two tracts that did not  
409 even pass the  $\alpha = .05$  significance threshold show increasing mean MWF with age on a descriptive  
410 level. Altogether, these findings suggest a myelin increase in scene network tracts with specific tracts  
411 displaying more pronounced age effects than others.

412 This pattern would suggest that scene network tracts' developmental trajectory resembles that  
413 of major long white matter tracts. Recent findings indicate that myelin in a majority of major white  
414 matter tracts increases from childhood into young adulthood (Meissner et al., 2019a). In this study,  
415 major tracts that may partly subserve scene network connecting tracts—i.e. the inferior longitudinal  
416 fasciculus—showed moderate myelin increases from middle childhood to adulthood. However, this

## Meissner et al. - Myelin development in visual scene-network tracts

417 remains speculative until other studies can replicate these findings, as our study's population was  
418 equal to the one investigated in Meissner et al. (2019a). If confirmed, this pattern would suggest a  
419 resemblance to cortical gray matter myelin content development, which displays development across  
420 late adolescence and up to early adulthood, too (Carey et al., 2018; Grydeland, Walhovd, Tamnes,  
421 Westlye, & Fjell, 2013; Miller et al., 2012; Shafee, Buckner, & Fischl, 2015).

422 Integrating our results with recent findings of functional cortical development in scene-  
423 selective areas during and beyond childhood (Chai et al., 2010; Golarai et al., 2007; Meissner et al.,  
424 2019b) opens up the possibility of structure-function interactions, i.e. influences of structural  
425 development on functional development, or vice versa. However, while previous studies established  
426 that the RSC is adult-like in middle childhood already (Jiang et al., 2014; Meissner et al., 2019b),  
427 tracts connecting the RSC to the left OPA (and possibly to the right OPA and left PPA) displayed  
428 development nonetheless. Either, this could mean that if structure-function interactions exist, they do  
429 not need the involvement, i.e. development, of both cortical ends of a tract. Or, no interactions might  
430 exist, i.e. structural and functional development might be independent. As cortical structure, function,  
431 and associated cognitive abilities have been associated with white matter structural development  
432 (Fields, 2008; Gomez et al., 2017), we speculate that a completely independent development of  
433 structure and function is unlikely.

### 434 **4.2 Connections between the scene network, hippocampus, and EVC**

435 Connections from the OPA to the HC indicate increasing myelination from middle childhood  
436 to adulthood in both hemispheres. For OPA-EVC connections, non-significant trends towards a myelin  
437 increase were observed. Interestingly, functional cluster size as well as scene selectivity in bilateral  
438 OPA was shown to increase along the same trajectory (Meissner et al., 2019b). As for within-scene  
439 network connections, to speculate, functional OPA development could be driven by maturing  
440 connections to input/output areas. Or, vice, versa, the maturation of OPA-associated fibers could be a  
441 case of activity dependent myelination (Fields, 2008). Connections from left RSC to EVC showed  
442 moderate effect sizes but significance did not survive Bonferroni correction. Possibly, this trend is a  
443 residual of an activity-dependent myelination that started following the completion of functional RSC  
444 maturation.

### 445 **4.3 Diffusion tensor imaging interpretation**

446 None of the investigated DTI parameters (FA, MD, RD, AD) mirrored any MWI findings  
447 except for FA age effects in connections between the scene network and the HC, where FA increased  
448 with age in left and right OPA-HC tracts. This generally missing correspondence might be explained  
449 by the fact that fiber geometry has a particularly high influence on DTI parameters in small tracts—  
450 like connections between scene-network areas. This high influence is due to a higher probability that  
451 two tracts with diverging principal diffusion directions cross, branch, or merge within one voxel  
452 (Feldman et al., 2010). Thus, especially in small tracts, the use of DTI parameters as a proxy for  
453 myelin is problematic and might not reflect myelination but rather other microstructural changes  
454 (Moura et al., 2016). For example, a recent study on the same study population that investigated major  
455 large tracts found a comparatively higher correspondence between DTI and MWF effects (Meissner et  
456 al., 2019a).

### 457 **4.4 Limitations**

458 With our investigation on the scene network white matter development our study provides an  
459 important contribution to an integrated understanding of how the scene network of PPA, RSC, and  
460 OPA develops. However, the methodological approach of our study has certain limitations that are  
461 discussed below.

462 Previous studies indicate that the optimal ratio of low-b acquisitions and high-b acquisitions is  
463 0.1 (Jones, Horsfield, & Simmons, 1999) to 0.2 (Alexander & Barker, 2005). Consequently, an  
464 optimal ratio for our protocol of 33 high-b acquisitions, would be achieved with 3-6 low-b ( $b=0$ )  
465 acquisitions (Mukherjee, Chung, Berman, Hess, & Henry, 2008). However, software limitations  
466 (Mukherjee et al., 2008) at the time of the recordings prevented the acquisition of more than one  $b=0$   
467 for a DWI session. Future studies with optimal scan protocols should therefore test whether our results  
468 are replicable.

469 The majority of studies in cognitive and developmental cognitive neuroscience quantify fiber  
470 geometry and microstructural properties of fiber tracts by means of the tensor model. This model  
471 assumes that, in each voxel, there is a unique orientation of fibers, the direction of which is  
472 represented by the tensor's main eigenvector (Mori & Tournier, 2014). However, large portions of

Meissner et al. - Myelin development in visual scene-network tracts

473 white matter voxels contain multiple fiber orientations (Jeurissen, Leemans, Tournier, Jones, &  
474 Sijbers, 2013). Therefore, tensor models are naturally limited to deal with voxels containing multiple  
475 fiber orientations (e.g. crossing fibers). Non-tensor-based models such as the method of constrained  
476 spherical deconvolution (CSD, Tournier, Calamante, Gadian, & Connelly, 2004) can be used to  
477 estimate the distribution of fiber orientations present within each voxel. With this method, the signal is  
478 measured by means of a high angular resolution diffusion imaging (HARDI) session, which should  
479 contain at least 45 diffusion directions (Tournier, Calamante, & Connelly, 2009) and higher b-values  
480 (e.g.  $b=3000$ , Farquharson et al., 2013). The diffusion signal measured with such a scan protocol can  
481 be expressed as the convolution—over spherical coordinates—of the response function representing  
482 the signal of a single coherently oriented population of fibers, with the fiber orientation distribution. In  
483 general, these kinds of deconvolution methods lead to a robust determination of the fiber orientations  
484 in voxel within a clinically acceptable time (Farquharson et al., 2013; Mori & Tournier, 2014) and  
485 have been shown to be superior to DWI-based tractography in the context of neurosurgical planning  
486 (Farquharson et al., 2013). With 33 diffusion directions and b-values of 1000 our scan protocol is not  
487 optimized for these kinds of advanced methods, so future should test whether the development of  
488 scene network-specific white matter tracts show similar trajectories if CSD-fiber tracking is employed.

489 As stated above, large portions of white matter voxels contain multiple fiber orientations  
490 (Jeurissen et al., 2013). While MWF is more specific to myelin than DTI-derived parameters, it is still  
491 not clear which exact axons within a voxel contribute to the MWF. Pathways that overlap and cross  
492 our scene-specific pathways in a substantially different direction, i.e. axon populations within voxels  
493 of our scene-pathways that do not serve the scene-specific connection, could influence the MWF at  
494 these points. Upon visual inspection, we could not identify major pathways that cross the scene-  
495 specific pathways on a regular basis except for the superior longitudinal fasciculus (SLF) that crosses  
496 the PPA-OPA tract. Aside from the fact that only for 1/6 of the tracts, a potential crossing tract exists  
497 that is reliably and automatically traceable with our data, even for the SLF and the PPA-OPA tract, the  
498 actual overlap was minimal: Only four tracts in four participants showed an overlap of more than 10%  
499 shared voxels and the maximum overlap was 18.9% shared voxels. Thus, the possible bias or the

Meissner et al. - Myelin development in visual scene-network tracts

500 possibility to identify a bias by quantifying MWF in cross-over and non-cross-over voxels is very  
501 small.

502 MWF has shown strong qualitative and quantitative correspondence with histological markers  
503 for myelin (Laule et al., 2006; Laule et al., 2008). Still, it is important to be aware of potential  
504 confounding factors that may influence in vivo measurement of myelin water—which remains an  
505 indirect measure (MacKay & Laule, 2016). The most important factor is movement of water from  
506 myelin bilayers during the measurement. The T2 decay curve approach, which is used for the MWF,  
507 assumes that water molecules stay in the myelin bilayers for long times compared to the decay curve  
508 measurement time. However, at least studies in rodent spines indicate that during the measurement  
509 water molecules might be able to move from myelin in sufficiently fast rates to cause artificially low  
510 MWF (Harkins, Dula, & Does, 2012; Levesque & Pike, 2009). At the same time, other studies in  
511 animals indicate that water exchange does not play a considerable role in MWF measurements  
512 (Stanisz, Kecojevic, Bronskill, & Henkelman, 1999). The effect of water exchange in humans has not  
513 yet been accurately quantified; however, it seems likely that measured MWF are slight underestimates  
514 of the true MWF (Kalantari, Laule, Bjarnason, Vavasour, & MacKay, 2011). Moreover, future studies  
515 should compare our findings to alternative in vivo MRI measures that are able to quantify myelin  
516 architecture, such as magnetization transfer imaging (MacKay & Laule, 2016), bound pool fraction  
517 (Stikov et al., 2011), or myelin density (Seppehrband et al., 2015).

## 518 **4.5 Outlook**

519 Here, we investigated the development of myelin in white matter tracts subserving the cortical  
520 visual scene network for the first time. We established that myelin seems to increase in several within-  
521 scene network tracts as well as in connections to crucial input regions. These results are exciting in so  
522 far as they demonstrate that the protracted scene network development between childhood and  
523 adulthood is not limited to functional changes, but also includes maturation of underlying structures  
524 that are not directly part of the cortical network. We are positive that our study opens up two further  
525 directions going forward. First, our cross-sectional study paves the way for large-scale longitudinal  
526 studies with short time intervals over an extended period of time and a high number of participants  
527 that combine behavioral testing, fMRI, DWI-tractography, and MWI, which could tap into the



Meissner et al. - Myelin development in visual scene-network tracts

528 important question of structure-function-development in more detail. Second, next to the scene  
529 network, other cortical category-specific high-level vision areas form networks. For example, face  
530 processing is supported by a core network with modules in the fusiform gyrus, inferior occipital gyrus,  
531 and superior temporal sulcus, for which evidence also suggests a prolonged functional development  
532 (e.g. Golarai et al., 2007; Nordt, Semmelmann, Genç, & Weigelt, 2018, for a review see Haist &  
533 Anzures, 2017). Only little evidence, based on DTI analysis of major white matter tracts, exists that  
534 hints at possible emerging structure-function relations in the developing face processing system  
535 (Scherf, Thomas, Doyle, & Behrmann, 2014). Using MWI and tractography of individual, short-range,  
536 face-area-specific tracts, future research might corroborate these first findings and shed more light on  
537 structural white matter development as a contributing developmental factor on the long way to (face)  
538 perception expertise.

539

## Acknowledgements

540

We thank our team of student assistants and interns for assisting in stimulus creation, pilot

541

testing, subject recruiting, and data collection. We acknowledge the support of the Neuroimaging

542

Centre of the Research Department of Neuroscience at Ruhr University Bochum's teaching hospital

543

Bergmannsheil and Philips GmbH, Germany. We thank all participants and their parents for

544

participating in this study.

545

## Funding

546

This work was supported by a PhD scholarship of the Konrad-Adenauer-Foundation and an

547

International Realization Budget of the Ruhr University Bochum Research School PLUS through

548

funds of the German Research Foundation's Universities Excellence Initiative (GSC 98/3) to TWM,

549

grants from the German Research Foundation (GE 2777/2-1 and SFB 1280 project A03), the Mercator

550

Research Center Ruhr (AN-2015-0044) to EG, and grants from the Deutsche Forschungsgemeinschaft

551

(DFG, German Research Foundation, project number WE 5802/1-1 and project number 316803389 –

552

SFB 1280 project A16), the Mercator Research Center Ruhr (AN-2014-0056), and the Volkswagen

553

Foundation (Lichtenberg Professorship, 97 079) to SW.

554

## Data and code availability statement

555

All code used for data analysis (except for the MWF parameter map generating algorithm,

556

which is available upon request), as well as anonymized raw data are publicly available at the Open

557

Science Framework (<https://doi.org/10.17605/osf.io/dbg83>).

558

### **Ethics statement**

559

The Ruhr University Bochum Faculty of Psychology ethics board approved the study

560

(proposal no. 280). All participants as well as children's parents gave informed written consent to

561

participate voluntarily.

562

### **Conflict of interest statement**

563

BM works at Philips GmbH, Hamburg, Germany. Philips is the manufacturer and support

564

service provider for the MRI machine used in this study. BM developed and implemented the GRASE

565

sequence at the scanner and co-developed and provided the MWF maps generating algorithm. BM and

566

Philips GmbH had no role in the funding, conceptualization, design, or statistical analysis of the study.

567

### **Author contributions**

568

Conceptualization: TWM, SW; Methodology: EG, BM; Software: BM; Formal Analysis:

569

TWM, EG; Investigation: TWM; Resources: SW, EG; Data Curation: TWM; Writing—Original

570

Draft: TWM; Writing—Review and Editing: TWM, SW, EG, BM; Visualization: TWM; Supervision:

571

SW, EG; Project Administration: TWM; Funding Acquisition: SW, TWM

572

573

574

## References

575 Alexander, D. C., & Barker, G. J. (2005). Optimal imaging parameters for fiber-orientation estimation  
576 in diffusion MRI. *Neuroimage*, 27(2), 357–367.

577 Baldassano, C., Beck, D. M., & Fei-Fei, L. (2013). Differential connectivity within the  
578 Parahippocampal Place Area. *Neuroimage*, 75, 228–237.

579 Baldassano, C., Esteva, A., Fei-Fei, L., & Beck, D. M. (2016a). Two Distinct Scene-Processing  
580 Networks Connecting Vision and Memory. *eNeuro*, 3(5).

581 Baldassano, C., Fei-Fei, L., & Beck, D. M. (2016b). Pinpointing the peripheral bias in neural scene-  
582 processing networks during natural viewing. *Journal of vision*, 16(2), 9.

583 Barnea-Goraly, N., Menon, V., Eckert, M., Tamm, L., Bammer, R., Karchemskiy, A., et al. (2005).  
584 White matter development during childhood and adolescence: a cross-sectional diffusion tensor  
585 imaging study. *Cerebral Cortex*, 15(12), 1848–1854.

586 Behrens, T. E. J., Berg, H. J., Jbabdi, S., Rushworth, M. F. S., & Woolrich, M. W. (2007).  
587 Probabilistic diffusion tractography with multiple fibre orientations: What can we gain?  
588 *Neuroimage*, 34(1), 144–155.

589 Behrens, T. E. J., Woolrich, M. W., Jenkinson, M., Johansen-Berg, H., Nunes, R. G., Clare, S., et al.  
590 (2003). Characterization and propagation of uncertainty in diffusion-weighted MR imaging.  
591 *Magnetic resonance in medicine*, 50(5), 1077–1088.

592 Bengtsson, S. L., Nagy, Z., Skare, S., Forsman, L., Forsberg, H., & Ullén, F. (2005). Extensive piano  
593 practicing has regionally specific effects on white matter development. *Nature neuroscience*, 8(9),  
594 1148–1150.

595 Benner, T., van der Kouwe, A. J. W., & Sorensen, A. G. (2011). Diffusion imaging with prospective  
596 motion correction and reacquisition. *Magnetic resonance in medicine*, 66(1), 154–167.

597 Bettencourt, K. C., & Xu, Y. (2013). The role of transverse occipital sulcus in scene perception and its  
598 relationship to object individuation in inferior intraparietal sulcus. *Journal of cognitive  
599 neuroscience*, 25(10), 1711–1722.

Meissner et al. - Myelin development in visual scene-network tracts

- 600 Carey, D., Caprini, F., Allen, M., Lutti, A., Weiskopf, N., Rees, G., et al. (2018). Quantitative MRI  
601 provides markers of intra-, inter-regional, and age-related differences in young adult cortical  
602 microstructure. *Neuroimage*, 182, 429–440.
- 603 Chai, X. J., Ofen, N., Jacobs, L. F., & Gabrieli, J. D.E. (2010). Scene complexity: Influence on  
604 perception, memory, and development in the medial temporal lobe. *Frontiers in Human*  
605 *Neuroscience*, 4(21), 21.
- 606 Dale, A. M., Fischl, B., & Sereno, M. I. (1999). Cortical surface-based analysis. I. Segmentation and  
607 surface reconstruction. *Neuroimage*, 9(2), 179–194.
- 608 Dalton, M. A., Zeidman, P., McCormick, C., & Maguire, E. A. (2018). Differentiable Processing of  
609 Objects, Associations, and Scenes within the Hippocampus. *The Journal of Neuroscience*, 38(38),  
610 8146–8159.
- 611 Day, M. C. (1975). Developmental Trends in Visual Scanning. In Hayne Reese (Ed.), *Advances in*  
612 *Child Development and Behavior* (1st ed., pp. 153–193). Cambridge, MA: Academic Press.
- 613 Dean, D. C., O'Muircheartaigh, J., Dirks, H., Waskiewicz, N., Lehman, K., Walker, L., et al. (2014).  
614 Modeling healthy male white matter and myelin development: 3 through 60months of age.  
615 *Neuroimage*, 84, 742–752.
- 616 Dean, D. C., O'Muircheartaigh, J., Dirks, H., Waskiewicz, N., Walker, L., Doernberg, E., et al. (2015).  
617 Characterizing longitudinal white matter development during early childhood. *Brain structure &*  
618 *function*, 220(4), 1921–1933.
- 619 Deoni, S. C. L., Dean, D. C., O'Muircheartaigh, J., Dirks, H., & Jerskey, B. A. (2012). Investigating  
620 white matter development in infancy and early childhood using myelin water fraction and relaxation  
621 time mapping. *Neuroimage*, 63(3), 1038–1053.
- 622 Deoni, S. C. L., Dean, D. C., Remer, J., Dirks, H., & O'Muircheartaigh, J. (2015). Cortical maturation  
623 and myelination in healthy toddlers and young children. *Neuroimage*, 115, 147–161.
- 624 Deoni, S. C. L., Mercure, E., Blasi, A., Gasston, D., Thomson, A., Johnson, M., et al. (2011). Mapping  
625 infant brain myelination with magnetic resonance imaging. *The Journal of Neuroscience*, 31(2),  
626 784–791.

Meissner et al. - Myelin development in visual scene-network tracts

- 627 Deoni, S. C. L., Rutt, B. K., Arun, T., Pierpaoli, C., & Jones, D. K. (2008). Gleaning multicomponent  
628 T1 and T2 information from steady-state imaging data. *Magnetic resonance in medicine*, *60*(6),  
629 1372–1387.
- 630 Dilks, D. D., Julian, J. B., Kubilius, J., Spelke, E. S., & Kanwisher, N. (2011). Mirror-image  
631 sensitivity and invariance in object and scene processing pathways. *The Journal of Neuroscience*,  
632 *31*(31), 11305–11312.
- 633 Epstein, R. A. (2008). Parahippocampal and retrosplenial contributions to human spatial navigation.  
634 *Trends in cognitive sciences*, *12*(10), 388–396.
- 635 Epstein, R. A., & Baker, C. I. (2019). Scene Perception in the Human Brain. *Annual review of vision*  
636 *science*, *5*, 373–397.
- 637 Epstein, R. A., & Higgins, J. S. (2007). Differential parahippocampal and retrosplenial involvement in  
638 three types of visual scene recognition. *Cerebral Cortex*, *17*(7), 1680–1693.
- 639 Epstein, R. A., Higgins, J. S., Jablonski, K., & Feiler, A. M. (2007a). Visual scene processing in  
640 familiar and unfamiliar environments. *Journal of neurophysiology*, *97*(5), 3670–3683.
- 641 Epstein, R. A., & Kanwisher, N. (1998). A cortical representation of the local visual environment.  
642 *Nature*, *392*(6676), 598–601.
- 643 Epstein, R. A., Parker, W. E., & Feiler, A. M. (2007b). Where am I now? Distinct roles for  
644 parahippocampal and retrosplenial cortices in place recognition. *The Journal of Neuroscience*,  
645 *27*(23), 6141–6149.
- 646 Farquharson, S., Tournier, J.-D., Calamante, F., Fabinyi, G., Schneider-Kolsky, M., Jackson, G. D., &  
647 Connelly, A. (2013). White matter fiber tractography: why we need to move beyond DTI. *Journal*  
648 *of neurosurgery*, *118*(6), 1367–1377.
- 649 Feldman, H. M., Yeatman, J. D., Lee, E. S., Barde, L. H. F., & Gaman-Bean, S. (2010). Diffusion  
650 tensor imaging: a review for pediatric researchers and clinicians. *Journal of developmental and*  
651 *behavioral pediatrics*, *31*(4), 346–356.
- 652 Fields, R. D. (2008). White matter in learning, cognition and psychiatric disorders. *Trends in*  
653 *Neurosciences*, *31*(7), 361–370.

Meissner et al. - Myelin development in visual scene-network tracts

- 654 Fields, R. D. (2015). A new mechanism of nervous system plasticity: activity-dependent myelination.  
655 *Nature Reviews Neuroscience*, *16*(12), 756–767.
- 656 Fischl, B., Rajendran, N., Busa, E., Augustinack, J., Hinds, O., Yeo, B. T. T., et al. (2008). Cortical  
657 folding patterns and predicting cytoarchitecture. *Cerebral Cortex*, *18*(8), 1973–1980.
- 658 Fischl, B., Salat, D. H., Busa, E., Albert, M., Dieterich, M., Haselgrove, C., et al. (2002). Whole Brain  
659 Segmentation. *Neuron*, *33*(3), 341–355.
- 660 Fischl, B., Sereno, M. I., & Dale, A. M. (1999). Cortical surface-based analysis. II: Inflation,  
661 flattening, and a surface-based coordinate system. *Neuroimage*, *9*(2), 195–207.
- 662 Fischl, B., van der Kouwe, A., Destrieux, C., Halgren, E., Ségonne, F., Salat, D. H., et al. (2004).  
663 Automatically parcellating the human cerebral cortex. *Cerebral Cortex*, *14*(1), 11–22.
- 664 Flechsig, P. (1920). *Anatomie des menschlichen Gehirns und Rückenmarks auf myelogenetischer*  
665 *Grundlage*. Leipzig: Thieme.
- 666 Ford, J. C., Hackney, D. B., Lavi, E., Phillips, M., & Patel, U. (1998). Dependence of apparent  
667 diffusion coefficients on axonal spacing, membrane permeability, and diffusion time in spinal cord  
668 white matter. *Journal of magnetic resonance imaging*, *8*(4), 775–782.
- 669 Geeraert, B. L., Lebel, R. M., Mah, A. C., Deoni, S. C. L., Alsop, D. C., Varma, G., & Lebel, C.  
670 (2018). A comparison of inhomogeneous magnetization transfer, myelin volume fraction, and  
671 diffusion tensor imaging measures in healthy children. *Neuroimage*, *182*, 343–350.
- 672 Genç, E., Bergmann, J., Singer, W., & Kohler, A. (2011). Interhemispheric connections shape  
673 subjective experience of bistable motion. *Current Biology*, *21*(17), 1494–1499.
- 674 Ghosh, S. S., Kakunoori, S., Augustinack, J., Nieto-Castanon, A., Kovelman, I., Gaab, N., et al.  
675 (2010). Evaluating the validity of volume-based and surface-based brain image registration for  
676 developmental cognitive neuroscience studies in children 4 to 11 years of age. *Neuroimage*, *53*(1),  
677 85–93.
- 678 Golarai, G., Ghahremani, D. G., Whitfield-Gabrieli, S., Reiss, A., Eberhardt, J. L., Gabrieli, J. D.E., &  
679 Grill-Spector, K. (2007). Differential development of high-level visual cortex correlates with  
680 category-specific recognition memory. *Nature neuroscience*, *10*(4), 512–522.

Meissner et al. - Myelin development in visual scene-network tracts

- 681 Gomez, J., Barnett, M. A., Natu, V., Mezer, A., Palomero-Gallagher, N., Weiner, K. S., et al. (2017).  
682 Microstructural proliferation in human cortex is coupled with the development of face processing.  
683 *Science*, 355(6320), 68–71.
- 684 Graham, K. S., Barense, M. D., & Lee, A. C. H. (2010). Going beyond LTM in the MTL: a synthesis  
685 of neuropsychological and neuroimaging findings on the role of the medial temporal lobe in  
686 memory and perception. *Neuropsychologia*, 48(4), 831–853.
- 687 Greve, D. N., & Fischl, B. (2009). Accurate and robust brain image alignment using boundary-based  
688 registration. *Neuroimage*, 48(1), 63–72.
- 689 Grill-Spector, K. (2003). The neural basis of object perception. *Current Opinion in Neurobiology*,  
690 13(2), 159–166.
- 691 Grill-Spector, K., & Malach, R. (2004). The human visual cortex. *Annual review of neuroscience*, 27,  
692 649–677.
- 693 Grydeland, H., Walhovd, K. B., Tamnes, C. K., Westlye, L. T., & Fjell, A. M. (2013). Intracortical  
694 myelin links with performance variability across the human lifespan: results from T1- and T2-  
695 weighted MRI myelin mapping and diffusion tensor imaging. *The Journal of Neuroscience*, 33(47),  
696 18618–18630.
- 697 Haist, F., & Anzures, G. (2017). Functional development of the brain's face-processing system. *Wiley*  
698 *interdisciplinary reviews. Cognitive science*, 8(1-2).
- 699 Harkins, K. D., Dula, A. N., & Does, M. D. (2012). Effect of intercompartmental water exchange on  
700 the apparent myelin water fraction in multiexponential T2 measurements of rat spinal cord.  
701 *Magnetic resonance in medicine*, 67(3), 793–800.
- 702 Hasson, U., Harel, M., Levy, I., & Malach, R. (2003). Large-Scale Mirror-Symmetry Organization of  
703 Human Occipito-Temporal Object Areas. *Neuron*, 37(6), 1027–1041.
- 704 Hodgetts, C. J., Shine, J. P., Lawrence, A. D., Downing, P. E., & Graham, K. S. (2016). Evidencing a  
705 place for the hippocampus within the core scene processing network. *Human Brain Mapping*,  
706 37(11), 3779–3794.



Meissner et al. - Myelin development in visual scene-network tracts

- 707 Hodgetts, C. J., Voets, N. L., Thomas, A. G., Clare, S., Lawrence, A. D., & Graham, K. S. (2017).  
708 Ultra-High-Field fMRI Reveals a Role for the Subiculum in Scene Perceptual Discrimination,  
709 37(12), 3150–3159.
- 710 Hutchison, R. M., Culham, J. C., Everling, S., Flanagan, J. R., & Gallivan, J. P. (2014). Distinct and  
711 distributed functional connectivity patterns across cortex reflect the domain-specific constraints of  
712 object, face, scene, body, and tool category-selective modules in the ventral visual pathway.  
713 *Neuroimage*, 96, 216–236.
- 714 Jenkinson, M., Bannister, P., Brady, M., & Smith, S. M. (2002). Improved Optimization for the  
715 Robust and Accurate Linear Registration and Motion Correction of Brain Images. *Neuroimage*,  
716 17(2), 825–841.
- 717 Jenkinson, M., Beckmann, C. F., Behrens, T. E. J., Woolrich, M. W., & Smith, S. M. (2012). FSL.  
718 *Neuroimage*, 62(2), 782–790.
- 719 Jenkinson, M., & Smith, S. M. (2001). A global optimisation method for robust affine registration of  
720 brain images. *Medical Image Analysis*, 5(2), 143–156.
- 721 Jeurissen, B., Leemans, A., Tournier, J.-D., Jones, D. K., & Sijbers, J. (2013). Investigating the  
722 prevalence of complex fiber configurations in white matter tissue with diffusion magnetic  
723 resonance imaging. *Human Brain Mapping*, 34(11), 2747–2766.
- 724 Jiang, P., Tokariev, M., Aronen, E. T., Salonen, O., Ma, Y., Vuontela, V., & Carlson, S. (2014).  
725 Responsiveness and functional connectivity of the scene-sensitive retrosplenial complex in 7-11-  
726 year-old children. *Brain and cognition*, 92C, 61–72.
- 727 Jones, D. K., Horsfield, M. A., & Simmons, A. (1999). Optimal strategies for measuring diffusion in  
728 anisotropic systems by magnetic resonance imaging. *Magnetic resonance in medicine*, 42(3), 515–  
729 525.
- 730 Jones, D. K., Knösche, T. R., & Turner, R. (2013). White matter integrity, fiber count, and other  
731 fallacies: the do's and don'ts of diffusion MRI. *Neuroimage*, 73, 239–254.

Meissner et al. - Myelin development in visual scene-network tracts

- 732 Julian, J. B., Ryan, J., Hamilton, R. H., & Epstein, R. A. (2016). The Occipital Place Area Is Causally  
733 Involved in Representing Environmental Boundaries during Navigation. *Current Biology*, 26(8),  
734 1104–1109.
- 735 Kalantari, S., Laule, C., Bjarnason, T. A., Vavasour, I. M., & MacKay, A. L. (2011). Insight into in  
736 vivo magnetization exchange in human white matter regions. *Magnetic resonance in medicine*,  
737 66(4), 1142–1151.
- 738 Koldewyn, K., Yendiki, A., Weigelt, S., Gweon, H., Julian, J., Richardson, H., et al. (2014).  
739 Differences in the right inferior longitudinal fasciculus but no general disruption of white matter  
740 tracts in children with autism spectrum disorder. *Proceedings of the National Academy of Sciences*  
741 *of the United States of America*, 111(5), 1981–1986.
- 742 Laule, C., Kozlowski, P., Leung, E., Li, D. K. B., MacKay, A. L., & Moore, G. R. W. (2008). Myelin  
743 water imaging of multiple sclerosis at 7 T: correlations with histopathology. *Neuroimage*, 40(4),  
744 1575–1580.
- 745 Laule, C., Leung, E., Lis, D. K. B., Traboulsee, A. L., Paty, D. W., MacKay, A. L., & Moore, G. R.  
746 W. (2006). Myelin water imaging in multiple sclerosis: quantitative correlations with  
747 histopathology. *Multiple sclerosis*, 12(6), 747–753.
- 748 Lebel, C., & Beaulieu, C. (2011). Longitudinal Development of Human Brain Wiring Continues from  
749 Childhood into Adulthood. *The Journal of Neuroscience*, 31(30), 10937–10947.
- 750 Levesque, I. R., & Pike, G. B. (2009). Characterizing healthy and diseased white matter using  
751 quantitative magnetization transfer and multicomponent T(2) relaxometry: A unified view via a  
752 four-pool model. *Magnetic resonance in medicine*, 62(6), 1487–1496.
- 753 Loenneker, T., Klaver, P., Bucher, K., Lichtensteiger, J., Imfeld, A., & Martin, E. (2011).  
754 Microstructural development: organizational differences of the fiber architecture between children  
755 and adults in dorsal and ventral visual streams. *Human Brain Mapping*, 32(6), 935–946.
- 756 MacKay, A. L., & Laule, C. (2016). Magnetic Resonance of Myelin Water: An in vivo Marker for  
757 Myelin. *Brain plasticity*, 2(1), 71–91.

Meissner et al. - Myelin development in visual scene-network tracts

- 758 MacKay, A. L., Whittall, K., Adler, J., Li, D. K. B., Paty, D., & Graeb, D. (1994). In vivo  
759 visualization of myelin water in brain by magnetic resonance. *Magnetic resonance in medicine*,  
760 31(6), 673–677.
- 761 Mackworth, N. H., & Bruner, J. S. (1970). How Adults and Children Search and Recognize Pictures.  
762 *Human Development*, 13(3), 149–177.
- 763 McCarthy, P. (2018). FSLEyes. *Zenodo*.
- 764 Meissner, T. W., Genç, E., Mädler, B., & Weigelt, S. (2019a). Myelination of major white matter  
765 tracts continues beyond childhood—combining tractography and myelin water imaging. *bioRxiv*,  
766 from <https://doi.org/10.1101/622233>.
- 767 Meissner, T. W., Nordt, M., & Weigelt, S. (2019b). Prolonged functional development of the  
768 parahippocampal place area and occipital place area. *Neuroimage*, 191, 104–115.
- 769 Meyers, S. M., Laule, C., Vavasour, I. M., Kolind, S. H., Mädler, B., Tam, R., et al. (2009).  
770 Reproducibility of myelin water fraction analysis: a comparison of region of interest and voxel-  
771 based analysis methods. *Magnetic resonance imaging*, 27(8), 1096–1103.
- 772 Miller, D. J., Duka, T., Stimpson, C. D., Schapiro, S. J., Baze, W. B., McArthur, M. J., et al. (2012).  
773 Prolonged myelination in human neocortical evolution. *Proceedings of the National Academy of*  
774 *Sciences of the United States of America*, 109(41), 16480–16485.
- 775 Miller, E. M. (1994). Intelligence and brain myelination: A hypothesis. *Personality and Individual*  
776 *Differences*, 17(6), 803–832.
- 777 Moore, G. R. W., Leung, E., MacKay, A. L., Vavasour, I. M., Whittall, K. P., Cover, K. S., et al.  
778 (2000). A pathology-MRI study of the short-T2 component in formalin-fixed multiple sclerosis  
779 brain. *Neurology*, 55(10), 1506–1510.
- 780 Mori, S., & Tournier, J.-D. (2014). *Introduction to diffusion tensor imaging and higher order models*  
781 (2nd edition). Boston: Academic Press.
- 782 Moura, L. M., Kempton, M., Barker, G., Salum, G., Gadelha, A., Pan, P. M., et al. (2016). Age-effects  
783 in white matter using associated diffusion tensor imaging and magnetization transfer ratio during  
784 late childhood and early adolescence. *Magnetic resonance imaging*, 34(4), 529–534.

Meissner et al. - Myelin development in visual scene-network tracts

- 785 Mukherjee, P., Chung, S. W., Berman, J. I., Hess, C. P., & Henry, R. G. (2008). Diffusion tensor MR  
786 imaging and fiber tractography: technical considerations. *AJNR. American journal of*  
787 *neuroradiology*, 29(5), 843–852.
- 788 Mukherjee, P., Miller, J. H., Shimony, J. S., Conturo, T. E., Lee, B. C., Almli, C. R., & McKinstry, R.  
789 C. (2001). Normal brain maturation during childhood: developmental trends characterized with  
790 diffusion-tensor MR imaging. *Radiology*, 221(2), 349–358.
- 791 Munsinger, H., & Gummerman, K. (1967). Identification of form in patterns of visual noise. *Journal*  
792 *of Experimental Psychology*, 75(1), 81–87.
- 793 Nordt, M., Semmelmann, K., Genç, E., & Weigelt, S. (2018). Age-related increase of image-  
794 invariance in the fusiform face area. *Developmental cognitive neuroscience*, 31, 46–57.
- 795 O'Craven, K. M., & Kanwisher, N. (2000). Mental imagery of faces and places activates  
796 corresponding stimulus-specific brain regions. *Journal of cognitive neuroscience*, 12(6), 1013–  
797 1023.
- 798 Oyefiade, A. A., Ameis, S., Lerch, J. P., Rockel, C., Szulc, K. U., Scantlebury, N., et al. (2018).  
799 Development of short-range white matter in healthy children and adolescents. *Human Brain*  
800 *Mapping*, 39(1), 204–217.
- 801 Prasloski, T., Rauscher, A., MacKay, A. L., Hodgson, M., Vavasour, I. M., Laule, C., & Mädler, B.  
802 (2012). Rapid whole cerebrum myelin water imaging using a 3D GRASE sequence. *Neuroimage*,  
803 63(1), 533–539.
- 804 Pruessmann, K. P., Weiger, M., Scheidegger, M. B., & Boesiger, P. (1999). SENSE: Sensitivity  
805 encoding for fast MRI. *Magnetic resonance in medicine*, 42(5), 952–962.
- 806 Pujol, J., Soriano-Mas, C., Ortiz, H., Sebastián-Gallés, N., Losilla, J. M., & Deus, J. (2006).  
807 Myelination of language-related areas in the developing brain. *Neurology*, 66(3), 339–343.
- 808 R Core Team (2019). R: A Language and Environment for Statistical Computing, from  
809 <https://www.R-project.org>.

Meissner et al. - Myelin development in visual scene-network tracts

- 810 Rollins, N. K., Glasier, P., Seo, Y., Morriss, M. C., Chia, J., & Wang, Z. (2010). Age-related  
811 variations in white matter anisotropy in school-age children. *Pediatric radiology*, *40*(12), 1918–  
812 1930.
- 813 Scherf, K. S., Thomas, C., Doyle, J., & Behrmann, M. (2014). Emerging structure-function relations in  
814 the developing face processing system. *Cerebral Cortex*, *24*(11), 2964–2980.
- 815 Ségonne, F., Dale, A. M., Busa, E., Glessner, M., Salat, D. H., Hahn, H. K., & Fischl, B. (2004). A  
816 hybrid approach to the skull stripping problem in MRI. *Neuroimage*, *22*(3), 1060–1075.
- 817 Sepehrband, F., Clark, K. A., Ullmann, J. F. P., Kurniawan, N. D., Leange, G., Reutens, D. C., &  
818 Yang, Z. (2015). Brain tissue compartment density estimated using diffusion-weighted MRI yields  
819 tissue parameters consistent with histology, *36*(9), 3687–3702.
- 820 Shafee, R., Buckner, R. L., & Fischl, B. (2015). Gray matter myelination of 1555 human brains using  
821 partial volume corrected MRI images. *Neuroimage*, *105*, 473–485.
- 822 Smith, S. M. (2002). Fast robust automated brain extraction. *Human Brain Mapping*, *17*(3), 143–155.
- 823 Stanisz, G. J., Kecojevic, A., Bronskill, M. J., & Henkelman, R. M. (1999). Characterizing white  
824 matter with magnetization transfer and T(2). *Magnetic resonance in medicine*, *42*(6), 1128–1136.
- 825 Stikov, N., Perry, L. M., Mezer, A., Rykhlevskaia, E., Wandell, B. A., Pauly, J. M., & Dougherty, R.  
826 F. (2011). Bound pool fractions complement diffusion measures to describe white matter micro and  
827 macrostructure. *Neuroimage*, *54*(2), 1112–1121.
- 828 Takahashi, M., Hackney, D. B., Zhang, G., Wehrli, S. L., Wright, A. C., O'Brien, W. T., et al. (2002).  
829 Magnetic resonance microimaging of intraaxonal water diffusion in live excised lamprey spinal  
830 cord. *Proceedings of the National Academy of Sciences of the United States of America*, *99*(25),  
831 16192–16196.
- 832 Tournier, J.-D., Calamante, F., & Connelly, A. (2009). How many diffusion gradient directions are  
833 required for HARDI? *Proceedings of the International Society for Magnetic Resonance in*  
834 *Medicine*, *17*, 358.

Meissner et al. - Myelin development in visual scene-network tracts

- 835 Tournier, J.-D., Calamante, F., Gadian, D. G., & Connelly, A. (2004). Direct estimation of the fiber  
836 orientation density function from diffusion-weighted MRI data using spherical deconvolution.  
837 *Neuroimage*, 23(3), 1176–1185.
- 838 van Wedeen, J., Hagmann, P., Tseng, W.-Y. I., Reese, T. G., & Weisskoff, R. M. (2005). Mapping  
839 complex tissue architecture with diffusion spectrum magnetic resonance imaging. *Magnetic  
840 resonance in medicine*, 54(6), 1377–1386.
- 841 Vass, L. K., & Epstein, R. A. (2013). Abstract representations of location and facing direction in the  
842 human brain. *The Journal of Neuroscience*, 33(14), 6133–6142.
- 843 Vurpillot, E. (1968). The development of scanning strategies and their relation to visual  
844 differentiation. *Journal of Experimental Child Psychology*, 6(4), 632–650.
- 845 Woolrich, M. W., Behrens, T. E. J., Beckmann, C. F., Jenkinson, M., & Smith, S. M. (2004).  
846 Multilevel linear modelling for FMRI group analysis using Bayesian inference. *Neuroimage*, 21(4),  
847 1732–1747.
- 848 Woolrich, M. W., Ripley, B. D., Brady, M., & Smith, S. M. (2001). Temporal autocorrelation in  
849 univariate linear modeling of FMRI data. *Neuroimage*, 14(6), 1370–1386.
- 850 Yakovlev, P. I., & Lecours, A.-R. (1967). The myelogenetic cycles of regional maturation of the brain.  
851 In A. Minkowski (Ed.), *Regional Development of the Brain Early in Life* (pp. 3–70). Boston, MA:  
852 Blackwell Scientific Publications Inc.
- 853 Yeatman, J. D., Dougherty, R. F., Ben-Shachar, M., & Wandell, B. A. (2012). Development of white  
854 matter and reading skills. *Proceedings of the National Academy of Sciences of the United States of  
855 America*, 109(44), E3045-53.
- 856 Yendiki, A., Panneck, P., Srinivasan, P., Stevens, A., Zöllei, L., Augustinack, J., et al. (2011).  
857 Automated probabilistic reconstruction of white-matter pathways in health and disease using an  
858 atlas of the underlying anatomy. *Frontiers in Neuroinformatics*, 5, 23.
- 859 Zatorre, R. J., Fields, R. D., & Johansen-Berg, H. (2012). Plasticity in gray and white: neuroimaging  
860 changes in brain structure during learning. *Nature neuroscience*, 15(4), 528–536.

Meissner et al. - Myelin development in visual scene-network tracts

861 Zeidman, P., Mullally, S. L., & Maguire, E. A. (2015). Constructing, Perceiving, and Maintaining  
862 Scenes: Hippocampal Activity and Connectivity. *Cerebral Cortex*, 25(10), 3836–3855.  
863
